# Supplementary material
Source: Research Square preprint supplement (doi:10.21203/rs.3.rs-10241865/v1)
Supplement: Supplementary file 1 [file ee400899e57b2ba1f7e8effb.docx]

# Supplementary Material

## Additional file 1. Model configuration at the time of execution.

| Parameter | Value |
| --- | --- |
| Provider | Anthropic |
| Model identifier | Claude Sonnet 4 (claude-sonnet-4-20250514) for scheduled tasks; Claude Opus 4 for interactive review sessions |
| Runtime | Claude Code CLI (v1.x) with cron-scheduled agent triggers |
| Reasoning settings | Default sampling; extended thinking enabled for scoring and triage tasks |
| Temperature / sampling | Provider defaults (not user-configurable in Claude Code CLI) |
| Skill invocation | Versioned skill modules loaded on demand from the repository |
| Artifact storage | Git version control (commits, branches, pull requests) |
| Reproducibility note | The model identifiers above are alias-based; exact model snapshots were not preserved per invocation. This is a limitation: provider-side model updates during the operating period may have introduced minor behavioral variation across runs. |

## Additional file 2. Win Readiness Score variable definitions and operational ranges.

| Variable | Definition | Range |
| --- | --- | --- |
| Eligibility_Gate | Binary gate: 1 if eligible or borderline-eligible; 0 if structurally ineligible | 0 or 1 |
| Fit | Composite of mission alignment, evidence base, geography, team strength, ask size, and product fit | 0.0-1.0 |
| Base_Rate_Funder | Public acceptance rate when available; category default when unavailable | 0.01-0.25 |
| Stage_Bonus | Multiplier applied when prior positive signals exist (interview advance, substantive feedback, active partner relationship) | 1.0-1.5 |

## Additional file 3. Repository issue labels and their operational meaning.

The labels below are exported from the project repository (arkangelai/grants). Triage assigns each opportunity one decision label; Win Readiness scoring assigns a priority band. Monitor-by-date and do-not-resurface (DNR) decisions are stored in the scouting-state file rather than as issue labels.

- **grant-opportunity**: tracked grant opportunity (pipeline entry point).
- **start-draft**: approved to begin drafting (researcher approves; writer starts).
- **on-hold**: approved in principle but paused; do not start yet.
- **vigilar-partner**: eligible but blocked until a partner is identified.
- **Letter of Intention**: pursued through direct outreach (no formal application portal).
- **discarded**: declined with a documented reason.
- **expired**: opportunity deadline has passed.
- **no fit**: out of scope; no product or mission fit.
- **grade-a / grade-b / grade-c / grade-d**: Win Readiness priority bands (A 90-100, immediate action; through D 45-59, worth tracking).
- **P0 / P1 / P2 / P3**: action-priority tiers (P0 apply now; P2 monitor for later).
- **draft-for-review**: draft ready for researcher review.
- **submitted**: submitted to the funder.
- **under-board-review**: funder is evaluating the submitted proposal.
